# Supplementary material
Source: PubMed Central journal article supplement (PMC1863478)
Supplement: pnas_0701705104_2.pdf [file pnas_0701705104_2.pdf]

**Table 3. The  $\omega$  values used in generating the DNA sequences in computer simulation**

| Proportion of codons | Selection scheme |      |      |      |             |      |             |      |             |      |             |
|----------------------|------------------|------|------|------|-------------|------|-------------|------|-------------|------|-------------|
|                      | B1               | F1   | F2   | B3   | F3          | B4   | F4          | B5   | F5          | B6   | F6          |
| 0.1                  | 1.00             | 1.00 | 1.00 | 1.00 | 1.00        | 1.00 | 1.00        | 1.00 | 1.00        | 1.00 | 1.00        |
| 0.1                  | 1.00             | 1.00 | 1.00 | 0.00 | 0.00        | 1.00 | 1.00        | 1.00 | 1.00        | 1.00 | 1.00        |
| 0.1                  | 0.80             | 1.00 | 1.00 | 0.80 | <b>8.00</b> | 0.80 | <b>8.00</b> | 0.80 | <b>8.00</b> | 0.80 | <b>8.00</b> |
| 0.1                  | 0.80             | 0.90 | 1.00 | 0.00 | 0.00        | 0.80 | 0.80        | 0.80 | 0.80        | 0.80 | 0.80        |
| 0.1                  | 0.50             | 1.00 | 1.00 | 0.50 | <b>5.00</b> | 0.50 | <b>5.00</b> | 0.50 | <b>5.00</b> | 0.50 | <b>5.00</b> |
| 0.1                  | 0.50             | 0.75 | 1.00 | 0.00 | 0.00        | 0.50 | 0.50        | 0.50 | 0.50        | 0.70 | 0.70        |
| 0.1                  | 0.20             | 1.00 | 1.00 | 0.20 | <b>2.00</b> | 0.20 | <b>2.00</b> | 0.20 | <b>2.00</b> | 0.20 | <b>2.00</b> |
| 0.1                  | 0.20             | 0.60 | 1.00 | 0.20 | 0.20        | 0.20 | 0.20        | 0.20 | 0.20        | 0.60 | 0.60        |
| 0.1                  | 0.00             | 1.00 | 1.00 | 0.00 | 0.00        | 0.00 | 0.00        | 0.90 | 0.90        | 0.90 | 0.90        |
| 0.1                  | 0.00             | 0.50 | 1.00 | 0.00 | 0.00        | 0.00 | 0.00        | 0.90 | 0.90        | 0.90 | 0.90        |
| Average $\omega$     | 0.50             | 0.88 | 1.00 | 0.27 | 1.62        | 0.50 | 1.85        | 0.68 | 2.03        | 0.74 | 2.09        |
