# Supplementary material
Source: PubMed Central journal article supplement (PMC1863478)
Supplement: pnas_0701705104_3.pdf [file pnas_0701705104_3.pdf]

**Table 4. False-positive rates of the branch-site likelihood method in detecting positive selection at the 5% significance level**

| Sequence length (codons) | Relaxation of negative selection |                            |
|--------------------------|----------------------------------|----------------------------|
|                          | Partial (F1) <sup>*</sup>        | Complete (F2) <sup>*</sup> |
| 150                      | 0.0050                           | 0.0175                     |
| 400                      | 0.0400                           | 0.0625                     |
| 1,000                    | 0.0450                           | 0.0775                     |

<sup>\*</sup> The models used for foreground branches are in parentheses. Model B1 was used for the background branches.
