# Supplementary material
Source: PubMed Central journal article supplement (PMC1863478)
Supplement: pnas_0701705104_4.pdf [file pnas_0701705104_4.pdf]

**Table 5. Basic statistics of the three datasets**

|              | All genes |        |        | Positively selected genes |       |       | Other genes |        |        |
|--------------|-----------|--------|--------|---------------------------|-------|-------|-------------|--------|--------|
|              | Q0        | Q10    | Q20    | Q0 ‡                      | Q10   | Q20   | Q0 ‡        | Q10    | Q20    |
| Human        |           |        |        |                           |       |       |             |        |        |
| No. of genes | 13,955    | 13,924 | 13,888 |                           | 165   | 154   |             | 13,759 | 13,734 |
| <i>n</i> *   | 19,398    | 19,231 | 19,000 |                           | 736   | 719   |             | 18,495 | 18,281 |
| <i>s</i> †   | 30,754    | 30,461 | 30,083 |                           | 541   | 531   |             | 29,920 | 29,552 |
| <i>n/s</i>   | 0.631     | 0.631  | 0.632  |                           | 1.360 | 1.354 |             | 0.618  | 0.619  |
| Chimp        |           |        |        |                           |       |       |             |        |        |
| No. of genes | 13,955    | 13,924 | 13,888 |                           | 424   | 233   |             | 13,500 | 13,655 |
| <i>n</i>     | 23,469    | 19,547 | 17,701 |                           | 1,882 | 991   |             | 17,665 | 16,710 |
| <i>s</i>     | 33,913    | 31,071 | 29,644 |                           | 2,041 | 956   |             | 29,030 | 28,688 |
| <i>n/s</i>   | 0.692     | 0.629  | 0.597  |                           | 0.922 | 1.037 |             | 0.609  | 0.582  |

\* Total number of nonsynonymous changes.

† Total number of synonymous changes.

‡ Positive selection is not tested for the Q0 data because the dataset is unsuitable for this analysis.
