# Supplementary material
Source: PubMed Central journal article supplement (PMC1863478)
Supplement: pnas_0701705104_5.pdf [file pnas_0701705104_5.pdf]

**Table 6. Genes ( $n = 154$ ) showing significant signal of positive selection in human before correction for multiple testing**

| Ensembl gene ID | Gene name    | Gene description *                                                                                                                                                                                                        | Mean $\omega$ † | $P$ value ‡ |
|-----------------|--------------|---------------------------------------------------------------------------------------------------------------------------------------------------------------------------------------------------------------------------|-----------------|-------------|
| ENSG00000165659 | DACH1        | Dachshund homolog 1 (Dach1).                                                                                                                                                                                              | 0.205           | 0.0000      |
| ENSG00000188153 | COL4A5       | Collagen alpha-5(IV) chain precursor.                                                                                                                                                                                     | 0.205           | 0.0000      |
| ENSG00000186395 | KRT10        | Keratin, type I cytoskeletal 10<br>(Cytokeratin-10) (CK-10) (Keratin-10)<br>(K10).                                                                                                                                        | 0.154           | 0.0001      |
| ENSG00000188712 | Q8NHB3_HUMAN | Seven transmembrane helix receptor.                                                                                                                                                                                       | 0.342           | 0.0001      |
| ENSG00000186683 |              |                                                                                                                                                                                                                           | 0.615           | 0.0001      |
| ENSG00000147889 | CDKN2A       | Cyclin-dependent kinase inhibitor 2A,<br>isoform 4 (p14ARF) (p19ARF).                                                                                                                                                     | 1.230           | 0.0001      |
| ENSG00000118298 | CA14         | Carbonic anhydrase 14 precursor (EC<br>4.2.1.1) (Carbonic anhydrase XIV)<br>(Carbonate dehydratase XIV) (CA-XIV).                                                                                                         | 0.820           | 0.0002      |
| ENSG00000180509 | KCNE1        | Potassium voltage-gated channel<br>subfamily E member 1 (IKs producing<br>slow voltage-gated potassium channel beta<br>subunit Mink) (Minimal potassium<br>channel) (Delayed rectifier potassium<br>channel subunit Isk). | 0.410           | 0.0002      |
| ENSG00000149054 | ZNF215       | Zinc finger protein 215 (BWSCR2-<br>associated zinc-finger protein 2) (BAZ 2).                                                                                                                                            | 1.230           | 0.0003      |
| ENSG00000136003 | NIFUN        | NifU-like N-terminal domain-containing<br>protein, mitochondrial precursor (NifU-<br>like protein) (Iron-sulfur cluster assembly<br>enzyme ISCU).                                                                         | 0.410           | 0.0003      |
| ENSG00000164626 | KCNK5        | Potassium channel subfamily K member 5<br>(Acid-sensitive potassium channel protein<br>TASK-2) (TWIK-related acid-sensitive<br>K(+) channel 2).                                                                           | 0.051           | 0.0003      |
| ENSG00000171522 | PTGER4       | Prostaglandin E2 receptor, EP4 subtype<br>(Prostanoid EP4 receptor) (PGE receptor,<br>EP4 subtype).                                                                                                                       | 0.820           | 0.0003      |
| ENSG00000174948 | GPR149       | Probable G-protein coupled receptor 149<br>(G-protein coupled receptor PGR10).                                                                                                                                            | 0.205           | 0.0005      |
| ENSG00000163069 | SGCB         | Beta-sarcoglycan (Beta-SG) (43 kDa<br>dystrophin-associated glycoprotein)<br>(43DAG) (A3b).                                                                                                                               | 0.137           | 0.0005      |
| ENSG00000169738 | DCXR         | L-xylulose reductase (EC 1.1.1.10) (XR)<br>(Dicarbonyl/L-xylulose reductase) (Kidney<br>dicarbonyl reductase) (kiDCR) (Carbonyl<br>reductase II) (Sperm surface protein<br>P34H).                                         | 0.205           | 0.0005      |
| ENSG00000164935 | TM7SF4       | Transmembrane 7 superfamily member 4<br>(Dendritic cell-specific transmembrane<br>protein) (DC-STAMP) (IL-4-induced<br>protein) (FIND).                                                                                   | 0.820           | 0.0005      |
| ENSG00000164977 |              |                                                                                                                                                                                                                           | 0.246           | 0.0006      |

|                 |              |                                                                                                                                                                          |       |        |
|-----------------|--------------|--------------------------------------------------------------------------------------------------------------------------------------------------------------------------|-------|--------|
| ENSG00000119596 | YLPM1        | YLP motif-containing protein 1 (Nuclear protein ZAP3) (ZAP113).                                                                                                          | 0.308 | 0.0008 |
| ENSG00000166004 | KIAA1731     | CDNA FLJ37899 fis, clone CD34C3000314.                                                                                                                                   | 1.025 | 0.0008 |
| ENSG00000119431 | HDHD3        | haloacid dehalogenase-like hydrolase domain containing 3                                                                                                                 | 0.410 | 0.0008 |
| ENSG00000185409 | Q8IYB0_HUMAN |                                                                                                                                                                          | 0.410 | 0.0009 |
| ENSG00000165632 | TAF3         | TAFII140 protein (Fragment).                                                                                                                                             | 0.410 | 0.0009 |
| ENSG00000136805 | NP_055149.1  |                                                                                                                                                                          | 0.205 | 0.0010 |
| ENSG00000165325 | CCDC67       |                                                                                                                                                                          | 0.410 | 0.0012 |
| ENSG00000177138 | FAM9B        | Protein FAM9B.                                                                                                                                                           | 0.410 | 0.0013 |
| ENSG00000150347 | ARID5B       | AT-rich interactive domain-containing protein 5B (ARID domain- containing protein 5B) (Mrf1-like) (Modulator recognition factor 2) (MRF-2).                              | 0.137 | 0.0015 |
| ENSG00000092470 | WDR76        | WD repeat domain 76                                                                                                                                                      | 0.410 | 0.0015 |
| ENSG00000160051 | IQCC         | IQ motif containing C                                                                                                                                                    | 1.640 | 0.0016 |
| ENSG00000100889 | PCK2         | Phosphoenolpyruvate carboxykinase [GTP], mitochondrial precursor (EC 4.1.1.32) (Phosphoenolpyruvate carboxylase) (PEPCK-M).                                              | 0.308 | 0.0017 |
| ENSG00000171227 | TMEM37       | Voltage-dependent calcium channel gamma-like subunit (Neuronal voltage-gated calcium channel gamma-like subunit) (Transmembrane protein 37).                             | 0.205 | 0.0017 |
| ENSG00000198935 |              |                                                                                                                                                                          | 0.410 | 0.0018 |
| ENSG00000090339 | ICAM1        | Intercellular adhesion molecule 1 precursor (ICAM-1) (Major group rhinovirus receptor) (CD54 antigen).                                                                   | 0.342 | 0.0019 |
| ENSG00000152939 | MARVELD2     | MARVEL domain containing 2 isoform 1                                                                                                                                     | 0.615 | 0.0021 |
| ENSG00000186074 | CD300LF      | NK inhibitory receptor precursor                                                                                                                                         | 0.547 | 0.0022 |
| ENSG00000164393 | GPR111       | Probable G-protein coupled receptor 111 (G-protein coupled receptor PGR20).                                                                                              | 1.230 | 0.0023 |
| ENSG00000138029 | HADHB        | Trifunctional enzyme beta subunit, mitochondrial precursor (TP-beta) [Includes: 3-ketoacyl-CoA thiolase (EC 2.3.1.16) (Acetyl-CoA acyltransferase) (Beta-ketothiolase)]. | 0.410 | 0.0024 |
| ENSG00000181908 | XR_000554.1  |                                                                                                                                                                          | 0.410 | 0.0027 |
| ENSG00000133101 | CCNA1        | Cyclin-A1.                                                                                                                                                               | 0.410 | 0.0027 |
| ENSG00000187475 | HIST1H1T     | Histone H1t (Testicular H1 histone).                                                                                                                                     | 2.460 | 0.0031 |
| ENSG00000164944 | KIAA1429     |                                                                                                                                                                          | 0.308 | 0.0032 |
| ENSG00000131018 | SYNE1        | Nesprin-1 (Nuclear envelope spectrin repeat protein 1) (Synaptic nuclear envelope protein 1) (Syne-1) (Myocyte nuclear envelope protein 1) (Myne-1) (Enaptin).           | 0.376 | 0.0033 |

|                 |              |                                                                                                                                                                                                                                              |       |        |
|-----------------|--------------|----------------------------------------------------------------------------------------------------------------------------------------------------------------------------------------------------------------------------------------------|-------|--------|
| ENSG00000116141 | MARK1        | Serine/threonine-protein kinase MARK1 (EC 2.7.1.37) (MAP/microtubule affinity-regulating kinase 1).                                                                                                                                          | 0.410 | 0.0034 |
| ENSG00000143851 | PTPN7        | Tyrosine-protein phosphatase non-receptor type 7 (EC 3.1.3.48) (Protein-tyrosine phosphatase LC-PTP) (Hematopoietic protein-tyrosine phosphatase) (HEPTP).                                                                                   | 0.273 | 0.0036 |
| ENSG00000138658 | NP_060862.2  |                                                                                                                                                                                                                                              | 0.513 | 0.0039 |
| ENSG00000163500 |              |                                                                                                                                                                                                                                              | 0.228 | 0.0040 |
| ENSG00000132677 | RHBG         | Rhesus blood group, B glycoprotein                                                                                                                                                                                                           | 0.410 | 0.0041 |
| ENSG00000123901 | GPR83        | Probable G-protein coupled receptor 83 precursor (G-protein coupled receptor 72).                                                                                                                                                            | 0.205 | 0.0042 |
| ENSG00000184574 | GPR92        | Probable G-protein coupled receptor 92.                                                                                                                                                                                                      | 0.410 | 0.0044 |
| ENSG00000104804 | TULP2        | Tubby-related protein 2 (Tubby-like protein 2).                                                                                                                                                                                              | 0.410 | 0.0044 |
| ENSG00000196893 | Q8N2W8_HUMAN |                                                                                                                                                                                                                                              | 1.640 | 0.0047 |
| ENSG00000170891 | CYTL1        | Cytokine-like protein 1 precursor (Protein C17).                                                                                                                                                                                             | 0.205 | 0.0047 |
| ENSG00000158292 | GPR153       | Probable G-protein coupled receptor 153 (G-protein coupled receptor PGR1).                                                                                                                                                                   | 0.308 | 0.0049 |
| ENSG00000158553 | POM121L2     |                                                                                                                                                                                                                                              | 0.923 | 0.0050 |
| ENSG00000130508 | PXDN         | PXDN protein (Fragment).                                                                                                                                                                                                                     | 0.082 | 0.0050 |
| ENSG00000087301 | KIAA1344     |                                                                                                                                                                                                                                              | 0.410 | 0.0052 |
| ENSG00000129696 | NP_079391.1  |                                                                                                                                                                                                                                              | 0.513 | 0.0053 |
| ENSG00000130818 | ZNF426       | Zinc finger protein 426.                                                                                                                                                                                                                     | 0.615 | 0.0054 |
| ENSG00000182551 | ADI1         | 1,2-dihydroxy-3-keto-5-methylthiopentene dioxygenase (EC 1.13.-.-) (Aci-reductone dioxygenase) (ARD) (Membrane-type 1 matrix metalloproteinase cytoplasmic tail-binding protein 1) (MTCBP-1) (Submergence-induced protein 2 homolog) (SIPL). | 0.410 | 0.0055 |
| ENSG00000135931 | ARMC9        |                                                                                                                                                                                                                                              | 0.820 | 0.0056 |
| ENSG00000033867 | SLC4A7       | Sodium bicarbonate cotransporter 3 (Sodium bicarbonate cotransporter 2) (Sodium bicarbonate cotransporter 2b) (Bicarbonate transporter) (Solute carrier familv 4 member 7).                                                                  | 0.164 | 0.0057 |
| ENSG00000011028 | MRC2         | Macrophage mannose receptor 2 precursor (Urokinase receptor-associated protein) (Endocytic receptor 180) (CD280 antigen).                                                                                                                    | 0.176 | 0.0059 |
| ENSG00000178977 | Q8NAT9_HUMAN |                                                                                                                                                                                                                                              | 2.050 | 0.0059 |
| ENSG00000183005 |              |                                                                                                                                                                                                                                              | 0.957 | 0.0061 |
| ENSG00000147223 | Q5JRB8_HUMAN | Novel protein (Fragment).                                                                                                                                                                                                                    | 0.410 | 0.0061 |
| ENSG00000139182 | CLSTN3       | Calsyntenin-3 precursor.                                                                                                                                                                                                                     | 0.103 | 0.0064 |

|                 |                |                                                                                                                                                                                                |       |        |
|-----------------|----------------|------------------------------------------------------------------------------------------------------------------------------------------------------------------------------------------------|-------|--------|
| ENSG00000162723 | SLAMF9         | SLAM family member 9 precursor (CD2 family member 10) (CD2F-10) (CD84 homolog 1) (CD84-H1).                                                                                                    | 0.820 | 0.0065 |
| ENSG00000185087 | NP_872368.1    |                                                                                                                                                                                                | 1.230 | 0.0068 |
| ENSG00000133805 | AMPD3          | AMP deaminase 3 (EC 3.5.4.6) (AMP deaminase isoform E) (Erythrocyte AMP deaminase).                                                                                                            | 0.410 | 0.0068 |
| ENSG00000164440 | TXLNB          | Beta-taxilin (Muscle-derived protein 77) (hMDP77).                                                                                                                                             | 0.328 | 0.0070 |
| ENSG00000177553 | Q8NDA9_HUMAN   | Novel protein (Fragment).                                                                                                                                                                      | 1.435 | 0.0070 |
| ENSG00000172769 | OR5B3          | Olfactory receptor 5B3 (Olfactory receptor OR11-239).                                                                                                                                          | 3.690 | 0.0072 |
| ENSG00000167987 | VPS37C         | vacuolar protein sorting 37C                                                                                                                                                                   | 0.547 | 0.0072 |
| ENSG00000165409 | TSHR           | Thyrotropin receptor precursor (TSH-R) (Thyroid-stimulating hormone receptor).                                                                                                                 | 0.547 | 0.0074 |
| ENSG00000118600 | TMEM5          | Transmembrane protein 5.                                                                                                                                                                       |       | 0.0074 |
| ENSG00000160781 | PAQR6          | Progesterone and adiponectin receptor family member VI.                                                                                                                                        | 0.410 | 0.0076 |
| ENSG00000036672 | USP2           | Ubiquitin carboxyl-terminal hydrolase 2 (EC 3.1.2.15) (Ubiquitin thiolesterase 2) (Ubiquitin-specific-processing protease 2) (Deubiquitinating enzyme 2) (41 kDa ubiquitin-specific protease). | 0.615 | 0.0076 |
| ENSG00000196476 | CT096_HUMAN    |                                                                                                                                                                                                | 1.435 | 0.0079 |
| ENSG00000197128 | NP_001019767.1 |                                                                                                                                                                                                | 0.615 | 0.0082 |
| ENSG00000100141 | PISD           | Phosphatidylserine decarboxylase proenzyme (EC 4.1.1.65) [Contains: Phosphatidylserine decarboxylase alpha chain; Phosphatidylserine decarboxylase beta chain].                                | 0.205 | 0.0085 |
| ENSG00000196242 | OR2C3          | Olfactory receptor 2C3.                                                                                                                                                                        |       | 0.0094 |
| ENSG00000137727 | ARHGAP20       | Rho GTPase activating protein 20                                                                                                                                                               | 1.025 | 0.0103 |
| ENSG00000170264 | NP_115556.1    |                                                                                                                                                                                                | 0.547 | 0.0103 |
| ENSG00000197586 | ENTPD6         | Ectonucleoside triphosphate diphosphohydrolase 6 (EC 3.6.1.6) (NTPDase6) (CD39 antigen-like 2).                                                                                                | 0.410 | 0.0104 |
| ENSG00000188996 | HUS1B          | Checkpoint protein HUS1B (hHUS1B).                                                                                                                                                             | 0.683 | 0.0115 |
| ENSG00000188039 | NP_001007526.1 |                                                                                                                                                                                                | 0.718 | 0.0117 |
| ENSG0000018607  | ZNF221         | Zinc finger protein 221.                                                                                                                                                                       | 1.025 | 0.0119 |
| ENSG00000198169 | ZNF251         | Zinc finger protein 251 (Fragment).                                                                                                                                                            | 1.230 | 0.0119 |
| ENSG00000186530 | XKR5           | XK-related protein 5.                                                                                                                                                                          | 3.280 | 0.0121 |
| ENSG00000188683 |                |                                                                                                                                                                                                | 1.640 | 0.0127 |
| ENSG00000137507 | LRRC32         | Leucine-rich repeat-containing protein 32 precursor (GARP protein) (Garpin) (Glycoprotein A repetitions predominant).                                                                          | 0.820 | 0.0136 |

|                 |                |                                                                                                                                                                                                           |       |        |
|-----------------|----------------|-----------------------------------------------------------------------------------------------------------------------------------------------------------------------------------------------------------|-------|--------|
| ENSG00000141837 | CACNA1A        | Voltage-dependent P/Q-type calcium channel alpha-1A subunit (Voltage-gated calcium channel alpha subunit Cav2.1) (Calcium channel, L type, alpha-1 polypeptide isoform 4) (Brain calcium channel I) (BI). | 0.205 | 0.0140 |
| ENSG00000163071 | SPATA18        | spermatogenesis associated 18 homolog                                                                                                                                                                     | 1.093 | 0.0143 |
| ENSG00000178966 | NP_079221.1    |                                                                                                                                                                                                           | 1.640 | 0.0149 |
| ENSG00000132357 | CARD6          | Caspase recruitment domain-containing protein 6.                                                                                                                                                          | 0.752 | 0.0150 |
| ENSG00000198483 | ANKRD35        | ankyrin repeat domain 35                                                                                                                                                                                  | 0.683 | 0.0151 |
| ENSG00000146232 | NFKBIE         | NF-kappa-B inhibitor epsilon (NF-kappa-BIE) (I-kappa-B-epsilon) (IkappaBepsilon) (IKB-epsilon) (IKBE).                                                                                                    | 0.410 | 0.0153 |
| ENSG00000158258 | CLSTN2         | Calsyntenin-2 precursor.                                                                                                                                                                                  | 0.224 | 0.0154 |
| ENSG00000102805 | CLN5           | Ceroid-lipofuscinosis neuronal protein 5 (Protein CLN5).                                                                                                                                                  | 0.308 | 0.0158 |
| ENSG00000176900 | OR51T1         | Olfactory receptor 51T1.                                                                                                                                                                                  | 0.273 | 0.0159 |
| ENSG00000129219 | PLD2           | Phospholipase D2 (EC 3.1.4.4) (PLD 2) (Choline phosphatase 2) (Phosphatidylcholine-hydrolyzing phospholipase D2) (PLD1C) (hPLD2).                                                                         | 0.205 | 0.0167 |
| ENSG00000091157 | WDR7           | WD-repeat protein 7 (TGF-beta resistance-associated protein TRAG) (Rabconnectin-3 beta).                                                                                                                  | 0.246 | 0.0168 |
| ENSG00000101405 | OXT            | Oxytocin-neurophysin 1 precursor (OT-NPI) [Contains: Oxytocin (Ocytocin); Neurophysin 1].                                                                                                                 | 0.205 | 0.0170 |
| ENSG00000174038 | NP_976044.1    |                                                                                                                                                                                                           | 3.690 | 0.0171 |
| ENSG00000182372 | CLN8           | Protein CLN8.                                                                                                                                                                                             | 0.137 | 0.0175 |
| ENSG00000168575 | SLC20A2        | solute carrier family 20, member 2                                                                                                                                                                        | 0.164 | 0.0183 |
| ENSG00000122971 | ACADS          | Acyl-CoA dehydrogenase, short-chain specific, mitochondrial precursor (EC 1.3.99.2) (SCAD) (Butyryl-CoA dehydrogenase).                                                                                   | 0.137 | 0.0189 |
| ENSG00000019169 | MARCO          | Macrophage receptor MARCO (Macrophage receptor with collagenous structure) (Scavenger receptor class A member 2).                                                                                         | 0.615 | 0.0196 |
| ENSG00000165238 | WNK2           | Serine/threonine-protein kinase WNK2 (EC 2.7.1.37) (Protein kinase with no lysine 2) (Protein kinase, lysine-deficient 2).                                                                                | 0.351 | 0.0198 |
| ENSG00000182805 | NP_001013756.1 |                                                                                                                                                                                                           | 1.025 | 0.0202 |
| ENSG00000197674 | Q8NH68_HUMAN   | Seven transmembrane helix receptor.                                                                                                                                                                       |       | 0.0206 |
| ENSG00000002726 | NM_001091.2    | amiloride binding protein 1 (amine oxidase (copper-containing)) (ABP1), mRNA                                                                                                                              | 0.293 | 0.0207 |
| ENSG00000139637 | MYG1_HUMAN     | MYG1 protein.                                                                                                                                                                                             | 0.410 | 0.0208 |

|                 |                |                                                                                                                                                                                                     |       |        |
|-----------------|----------------|-----------------------------------------------------------------------------------------------------------------------------------------------------------------------------------------------------|-------|--------|
| ENSG00000105501 | SIGLEC5        | Sialic acid-binding Ig-like lectin 5 precursor (Siglec-5) (Obesity- binding protein 2) (OB-binding protein 2) (OB-BP2) (CD33 antigen-like 2) (CD170 antigen).                                       |       | 0.0214 |
| ENSG00000095637 | SORBS1         | Sorbin and SH3 domain-containing protein 1 (Ponsin) (c-Cbl-associated protein) (CAP) (SH3 domain protein 5) (SH3P12).                                                                               | 0.234 | 0.0218 |
| ENSG00000196118 | NP_001014979.1 |                                                                                                                                                                                                     | 0.205 | 0.0222 |
| ENSG00000141458 | NPC1           | Niemann-Pick C1 protein precursor.                                                                                                                                                                  | 0.469 | 0.0224 |
| ENSG00000189348 | XP_934528.1    | PREDICTED: hypothetical protein XP 934528                                                                                                                                                           | 0.547 | 0.0225 |
| ENSG00000120875 | DUSP4          | Dual specificity protein phosphatase 4 (EC 3.1.3.48) (EC 3.1.3.16) (Mitogen-activated protein kinase phosphatase 2) (MAP kinase phosphatase 2) (MKP-2) (Dual specificity protein phosphatase hVH2). | 0.103 | 0.0227 |
| ENSG00000104635 | SLC39A14       | solute carrier family 39 (zinc transporter), member 14                                                                                                                                              | 0.205 | 0.0227 |
| ENSG00000008438 | PGLYRP1        | Peptidoglycan recognition protein precursor (PGRP-S).                                                                                                                                               | 2.050 | 0.0245 |
| ENSG00000086288 | TXNDC3         | Thioredoxin domain-containing protein 3 (Spermatid-specific thioredoxin-2) (Sptrx-2) (NM23-H8).                                                                                                     | 0.615 | 0.0245 |
| ENSG00000164520 | RAET1E         | NKG2D ligand 4 precursor (NKG2D ligand 4) (NKG2DL4) (N2DL-4) (Retinoic acid early transcript 1E) (Lymphocyte effector toxicity activation ligand) (RAE-1-like transcript 4) (RL-4).                 | 0.410 | 0.0249 |
| ENSG00000064042 | NP_055803.1    |                                                                                                                                                                                                     | 0.205 | 0.0257 |
| ENSG00000165125 | TRPV6          | Transient receptor potential cation channel subfamily V member 6 (TrpV6) (Epithelial calcium channel 2) (ECaC2) (Calcium transport protein 1) (CaT1) (CaT-like) (CaT-L).                            | 0.513 | 0.0269 |
| ENSG00000125631 |                |                                                                                                                                                                                                     | 3.280 | 0.0275 |
| ENSG00000140950 | NP_065998.2    |                                                                                                                                                                                                     | 0.410 | 0.0283 |
| ENSG00000109674 | NEIL3          | Endonuclease VIII-like 3 (Nei-like 3) (DNA glycosylase FPG2).                                                                                                                                       |       | 0.0293 |
| ENSG00000174655 |                |                                                                                                                                                                                                     | 0.615 | 0.0294 |
| ENSG00000154719 | MRPL39         | Mitochondrial 39S ribosomal protein L39 (L39mt) (MRP-L39) (MRP-L5).                                                                                                                                 | 0.513 | 0.0301 |
| ENSG00000100376 | CV008_HUMAN    |                                                                                                                                                                                                     | 0.820 | 0.0306 |
| ENSG00000187705 | Q6ZUC2_HUMAN   | CDNA FLJ43826 fis, clone TESTI4002703.                                                                                                                                                              |       | 0.0312 |
| ENSG00000167945 | NP_001013660.1 |                                                                                                                                                                                                     | 1.640 | 0.0314 |

|                 |                |                                                                                                                                                                                                                                                                 |       |        |
|-----------------|----------------|-----------------------------------------------------------------------------------------------------------------------------------------------------------------------------------------------------------------------------------------------------------------|-------|--------|
| ENSG00000153201 | RANBP2         | Ran-binding protein 2 (RanBP2) (Nuclear pore complex protein Nup358) (Nucleoporin Nup358) (358 kDa nucleoporin) (P270).                                                                                                                                         | 0.351 | 0.0331 |
| ENSG00000062370 | ZNF228         | Zinc finger protein 228.                                                                                                                                                                                                                                        | 0.478 | 0.0338 |
| ENSG00000171936 | OR10H3         | Olfactory receptor 10H3.                                                                                                                                                                                                                                        |       | 0.0339 |
| ENSG00000088836 | SLC4A11        | Sodium bicarbonate transporter-like protein 11 (Bicarbonate transporter-related protein 1) (Solute carrier family 4 member 11).                                                                                                                                 | 0.342 | 0.0342 |
| ENSG00000162745 | OLFML2B        | olfactomedin-like 2B                                                                                                                                                                                                                                            | 0.319 | 0.0347 |
| ENSG00000180116 | NP_001026918.2 |                                                                                                                                                                                                                                                                 |       | 0.0371 |
| ENSG00000182348 | NP_857597.1    |                                                                                                                                                                                                                                                                 | 1.312 | 0.0373 |
| ENSG00000147804 | SLC39A4        | Zinc transporter ZIP4 precursor (Solute carrier family 39 member 4).                                                                                                                                                                                            | 2.050 | 0.0392 |
| ENSG00000076382 | SPAG5          | Sperm-associated antigen 5 (Astrin) (Mitotic spindle-associated protein p126) (MAP126) (Deepest).                                                                                                                                                               |       | 0.0397 |
| ENSG00000124568 | SLC17A1        | Renal sodium-dependent phosphate transport protein 1 (Sodium/phosphate cotransporter 1) (Na(+)/PI cotransporter 1) (Renal sodium-phosphate transport protein 1) (Renal Na(+)-dependent phosphate cotransporter 1) (Solute carrier family 18 member 1) (NA/PI-4) |       | 0.0402 |
| ENSG00000082269 | KIAA1411       |                                                                                                                                                                                                                                                                 | 0.273 | 0.0412 |
| ENSG00000186453 | Q86W67_HUMAN   |                                                                                                                                                                                                                                                                 | 2.050 | 0.0414 |
| ENSG00000102794 |                |                                                                                                                                                                                                                                                                 |       | 0.0423 |
| ENSG00000189424 |                |                                                                                                                                                                                                                                                                 |       | 0.0429 |
| ENSG00000166801 | FAM111A        |                                                                                                                                                                                                                                                                 | 2.870 | 0.0432 |
| ENSG00000083622 | NP_060296.1    |                                                                                                                                                                                                                                                                 | 3.280 | 0.0454 |
| ENSG00000122490 | PQLC1          | PQ loop repeat containing 1                                                                                                                                                                                                                                     | 0.273 | 0.0463 |
| ENSG00000164649 | CDCA7L         | transcription factor RAM2                                                                                                                                                                                                                                       | 0.273 | 0.0466 |
| ENSG00000104974 | LILRA1         | Leukocyte immunoglobulin-like receptor subfamily A member 1 precursor (Leucocyte immunoglobulin-like receptor 6) (LIR-6) (CD85i antigen).                                                                                                                       | 0.525 | 0.0486 |
| ENSG00000184278 |                |                                                                                                                                                                                                                                                                 |       | 0.0491 |
| ENSG00000162591 | EGFL3          | EGF-like domain-containing protein 3 precursor (Multiple EGF-like domain protein 3) (Multiple epidermal growth factor-like domains 6).                                                                                                                          | 3.690 | 0.0498 |
| ENSG00000179750 | APOBEC3B       | Probable DNA dC->dU-editing enzyme APOBEC-3B (EC 3.5.4.-) (Phorbolin- 1-related protein) (Phorbolin-2/3).                                                                                                                                                       | 1.333 | 0.0498 |

\* Gene descriptions downloaded from Ensembl. Blanks indicate information not available or unknown.

† Average nonsynonymous/synonymous substitution rate ratio for the human lineage, computed by 0.41  $n/s$ . Blank indicates no synonymous changes.

‡ Uncorrected  $P$  value from likelihood ratio test.
