# Supplementary material
Source: PubMed Central journal article supplement (PMC1863478)
Supplement: pnas_0701705104_9.pdf [file pnas_0701705104_9.pdf]

**Table 10. Genes showing significant signal of positive selection in both human and chimp lineages**

| Ensembl gene ID | Gene name    | Gene description *                                                                                  | Human           |                  | Chimp           |                  |
|-----------------|--------------|-----------------------------------------------------------------------------------------------------|-----------------|------------------|-----------------|------------------|
|                 |              |                                                                                                     | Mean $\omega$ † | <i>P</i> value ‡ | Mean $\omega$ † | <i>P</i> value ‡ |
| ENSG00000116141 | MARK1        | Serine/threonine-protein kinase MARK1 (EC 2.7.1.37) (MAP/microtubule affinity-regulating kinase 1). | 0.410           | 0.0034           | 0.410           | 0.0000           |
| ENSG00000177553 | Q8NDA9_HUMAN | Novel protein (Fragment).                                                                           | 1.435           | 0.0070           | 0.615           | 0.0049           |
| ENSG00000188683 |              |                                                                                                     | 1.640           | 0.0127           | 0.410           | 0.0001           |
| ENSG00000158258 | CLSTN2       | Calsyntenin-2 precursor.                                                                            | 0.224           | 0.0154           | 0.718           | 0.0019           |
| ENSG00000095637 | SORBS1       | Sorbin and SH3 domain-containing protein 1                                                          | 0.234           | 0.0218           | 0.234           | 0.0001           |
| ENSG00000141458 | NPC1         | Niemann-Pick C1 protein precursor.                                                                  | 0.469           | 0.0224           | 0.293           | 0.0041           |
| ENSG00000184278 |              |                                                                                                     |                 | 0.0491           | 0.547           | 0.0318           |

\* Gene descriptions downloaded from Ensembl. Blanks indicate information not available or unknown.

† Average nonsynonymous/synonymous substitution rate ratio, computed by  $0.41 n/s$ . Blank indicates no synonymous changes.

‡ Uncorrected *P* value from likelihood ratio test.
