# Supplementary material
Source: PubMed Central journal article supplement (PMC1863478)
Supplement: pnas_0701705104_10.pdf [file pnas_0701705104_10.pdf]

**Table 11. Numbers of genes with regard to tissue-specificity of expression**

|                     | Human |        | Chimp |        |
|---------------------|-------|--------|-------|--------|
|                     | PSGs  | Others | PSGs  | Others |
| Non-tissue-specific | 90    | 8,710  | 143   | 8,657  |
| Tissue-specific     | 37    | 3,262  | 52    | 3,247  |
| Sum                 | 127   | 11,972 | 195   | 11,904 |
