# Supplementary material
Source: PubMed Central journal article supplement (PMC1863478)
Supplement: pnas_0701705104_11.pdf [file pnas_0701705104_11.pdf]

**Table 12. Tissue groups combined from individual tissues**

| Tissue group                              | Tissue                                                                                                                                                                                                                                                                          |
|-------------------------------------------|---------------------------------------------------------------------------------------------------------------------------------------------------------------------------------------------------------------------------------------------------------------------------------|
| Adipocyte                                 | Adipocyte                                                                                                                                                                                                                                                                       |
| Brain                                     | Temporal lobe, Globus pallidus, Cerebellum peduncles, Cerebellum, Caudate nucleus, Whole brain, Parietal lobe, Medulla oblongata, Amygdala, Prefrontal cortex, Occipital lobe, Hypothalamus, Thalamus, Subthalamic nucleus, Cingulate cortex, Pons, Fetal brain, Olfactory bulb |
| CNS non-brain                             | Ciliary ganglion, DRG, Spinal cord, Trigeminal Ganglion                                                                                                                                                                                                                         |
| Endocrine                                 | Adrenal cortex, Adrenal gland, Fetal thyroid, Pancreas, Pancreatic islets, Pituitary, Thyroid                                                                                                                                                                                   |
| Heart                                     | Atrioventricular node, Cardiac myocytes, Heart                                                                                                                                                                                                                                  |
| Immune                                    | 721B lymphoblasts, Appendix, BMCD105 endothelial, BMCD33 myeloid, BMCD34, BMCD71 early erythroid, Bone marrow, Lymph node, PBCD14 monocytes, PBBDCA4 dendritic cells, PBCD56NK cells, PBCD4T cells, PBCD8T cells, PBCD19B cells, Thymus, Tonsil, Whole blood                    |
| Kidney                                    | Kidney                                                                                                                                                                                                                                                                          |
| Liver                                     | Fetal liver, Liver                                                                                                                                                                                                                                                              |
| Lung                                      | Bronchial epithelial cells, Fetal lung, Lung                                                                                                                                                                                                                                    |
| Ovary                                     | Ovary                                                                                                                                                                                                                                                                           |
| Pathogenic (not included in the analysis) | Colorectal adenocarcinoma, Leukemia chronicmyelogenous k562, Leukemia lymphoblastic molt 4, Leukemia promyelocytic hl60, Lymphoma burkitts Daudi, Lymphoma burkitts Raji                                                                                                        |
| Placenta                                  | Placenta                                                                                                                                                                                                                                                                        |
| Prostate                                  | Prostate                                                                                                                                                                                                                                                                        |
| Salivary gland                            | Salivary gland                                                                                                                                                                                                                                                                  |
| Skeletal muscle                           | Skeletal muscle                                                                                                                                                                                                                                                                 |
| Skin                                      | Skin                                                                                                                                                                                                                                                                            |
| Smooth muscle                             | Smooth muscle                                                                                                                                                                                                                                                                   |
| Testis                                    | Germ cell, Leydig cell, Seminiferous tubule, Testis, Testis interstitial                                                                                                                                                                                                        |
| Tongue                                    | Tongue                                                                                                                                                                                                                                                                          |
| Trachea                                   | Trachea                                                                                                                                                                                                                                                                         |
| Uterus                                    | Uterus, Uterus corpus                                                                                                                                                                                                                                                           |
