# Supplementary material
Source: PubMed Central journal article supplement (PMC1863478)
Supplement: pnas_0701705104_12.pdf [file pnas_0701705104_12.pdf]

**Table 13. Genes showing significant signal of positive selection and associated with human disease**

| Lineage         | Ensembl gene ID | Gene name                                                                                                | Gene description *                                                                                                                                                                                                                                                | OMIM ID                | Disease description †                                     |
|-----------------|-----------------|----------------------------------------------------------------------------------------------------------|-------------------------------------------------------------------------------------------------------------------------------------------------------------------------------------------------------------------------------------------------------------------|------------------------|-----------------------------------------------------------|
| Both            | ENSG00000141458 | NPC1                                                                                                     | Niemann-Pick C1 protein precursor.                                                                                                                                                                                                                                | 257220                 | Niemann-Pick disease, type C                              |
|                 |                 |                                                                                                          |                                                                                                                                                                                                                                                                   | 257220                 | Niemann-Pick disease, type D                              |
| Chimp           | ENSG00000001626 | CFTR                                                                                                     | Cystic fibrosis transmembrane conductance regulator (CFTR) (cAMP- dependent chloride channel) (ATP-binding cassette transporter sub- family C member 7).                                                                                                          | 602421                 | Congenital bilateral absence of vas deferens              |
|                 |                 |                                                                                                          |                                                                                                                                                                                                                                                                   | 602421                 | Cystic fibrosis                                           |
|                 | ENSG00000100312 | ACR                                                                                                      | Acrosin precursor (EC 3.4.21.10) [Contains: Acrosin light chain; Acrosin heavy chain].                                                                                                                                                                            | 602421                 | Sweat chloride elevation without CF                       |
|                 |                 |                                                                                                          |                                                                                                                                                                                                                                                                   | 102480                 | Male infertility due to acrosin deficiency                |
|                 | ENSG00000100368 | CSF2RB                                                                                                   | Cytokine receptor common beta chain precursor (GM-CSF/IL-3/IL-5 receptor common beta-chain) (CD131 antigen) (CDw131).                                                                                                                                             | 138981                 | Pulmonary alveolar proteinosis                            |
|                 | ENSG00000101076 | HNF4A                                                                                                    | Hepatocyte nuclear factor 4-alpha (HNF-4-alpha) (Transcription factor HNF-4) (Transcription factor 14).                                                                                                                                                           | 600281                 | MODY, type 1                                              |
|                 |                 |                                                                                                          |                                                                                                                                                                                                                                                                   | 600281                 | Non-insulin-dependent diabetes mellitus                   |
|                 | ENSG00000103449 | SALL1                                                                                                    | Sal-like protein 1 (Zinc finger protein SALL1) (Spalt-like transcription factor 1) (HSall1).                                                                                                                                                                      | 602218                 | Townes-Brocks syndrome                                    |
|                 | ENSG00000113905 | HRG                                                                                                      | Histidine-rich glycoprotein precursor (Histidine-proline-rich glycoprotein) (HPRG).                                                                                                                                                                               | 142640                 | Thrombophilia due to elevated HRG                         |
|                 | ENSG00000135346 | CGA                                                                                                      | Glycoprotein hormones alpha chain precursor (Anterior pituitary glycoprotein hormones common alpha subunit) (Follitropin alpha chain) (Follicle-stimulating hormone alpha chain) (FSH-alpha) (Lutropin alpha chain) (Luteinizing hormone alpha chain) (LSH-alpha) | 307150                 | Hypertrichosis, congenital generalized                    |
|                 | ENSG00000135605 | TEC                                                                                                      | Tyrosine-protein kinase Tec (EC 2.7.1.112).                                                                                                                                                                                                                       | 148500                 | Tylosis with esophageal cancer                            |
| ENSG00000173230 | GOLGB1          | Golgin subfamily B member 1 (Giantin) (Macrogolgin) (372 kDa Golgi complex-associated protein) (GCP372). | 303800                                                                                                                                                                                                                                                            | Colorblindness, deutan |                                                           |
| ENSG00000197912 | SPG7            | Paraplegin (EC 3.4.24.-) (Spastic paraplegia protein                                                     | 602783                                                                                                                                                                                                                                                            | Spastic paraplegia-7   |                                                           |
| Human           | ENSG00000102805 | CLN5                                                                                                     | Ceroid-lipofuscinosis neuronal protein 5 (Protein CLN5).                                                                                                                                                                                                          | 256731                 | Ceroid-lipofuscinosis, neuronal-5, variant late infantile |
|                 | ENSG00000122971 | ACADS                                                                                                    | Acyl-CoA dehydrogenase, short-chain specific, mitochondrial precursor (EC 1.3.99.2) (SCAD) (Butyryl-CoA dehydrogenase).                                                                                                                                           | 201470                 | Acyl-CoA dehydrogenase, short-chain, deficiency of        |
|                 | ENSG00000133805 | AMPD3                                                                                                    | AMP deaminase 3 (EC 3.5.4.6) (AMP deaminase isoform E) (Erythrocyte AMP deaminase).                                                                                                                                                                               | 102772                 | AMP deaminase deficiency, erythrocytic                    |

|                 |         |                                                                                                                                                                                                            |                                      |                                                                                                                           |
|-----------------|---------|------------------------------------------------------------------------------------------------------------------------------------------------------------------------------------------------------------|--------------------------------------|---------------------------------------------------------------------------------------------------------------------------|
| ENSG00000138029 | HADHB   | Trifunctional enzyme beta subunit, mitochondrial precursor (TP-beta) [Includes: 3-ketoacyl-CoA thiolase (EC 2.3.1.16) (Acetyl-CoA acyltransferase) (Beta-ketothiolase)].                                   | 143450                               | Trifunctional protein deficiency, type II                                                                                 |
| ENSG00000141837 | CACNA1A | Voltage-dependent P/Q-type calcium channel alpha-1A subunit (Voltage-gated calcium channel alpha subunit Cav2.1) (Calcium channel, L type, alpha-1 polypeptide isoform 4) (Brain calcium channel I) (BI).  | 601011<br>601011<br>601011<br>601011 | Cerebellar ataxia, pure<br>Episodic ataxia, type 2<br>Hemiplegic migraine, familial<br>Spinocerebellar ataxia-6           |
| ENSG00000147889 | CDKN2A  | Cyclin-dependent kinase inhibitor 2A, isoform 4 (p14ARF) (p19ARF).                                                                                                                                         | 155600<br>600160                     | Malignant melanoma, cutaneous<br>Melanoma                                                                                 |
| ENSG00000163069 | SGCB    | Beta-sarcoglycan (Beta-SG) (43 kDa dystrophin-                                                                                                                                                             | 600900                               | Muscular dystrophy, limb-girdle, type                                                                                     |
| ENSG00000165125 | TRPV6   | Transient receptor potential cation channel subfamily V member 6 (TrpV6) (Epithelial calcium channel 2) (ECaC2) (Calcium transport protein 1) (CaT1) (CaT-like) (CaT-L).                                   | 600184                               | Carnitine acetyltransferase deficiency                                                                                    |
| ENSG00000165409 | TSHR    | Thyrotropin receptor precursor (TSH-R) (Thyroid-stimulating hormone receptor).                                                                                                                             | 275200<br>275200<br>275200<br>275200 | Graves disease<br>Hyperthyroidism, congenital<br>Hypothyroidism, nongoitrous, due to<br>Thyroid adenoma, hyperfunctioning |
| ENSG00000169738 | DCXR    | L-xylulose reductase (EC 1.1.1.10) (XR) (Dicarbonyl/L-xylulose reductase) (Kidney dicarbonyl reductase) (kiDCR) (Carbonyl reductase II) (Sperm surface protein P34H).                                      | 190685                               | Down syndrome                                                                                                             |
| ENSG00000180509 | KCNE1   | Potassium voltage-gated channel subfamily E member 1 (IKs producing slow voltage-gated potassium channel beta subunit Mink) (Minimal potassium channel) (Delayed rectifier potassium channel subunit IsK). | 176261                               | Jervell and Lange-Nielsen syndrome                                                                                        |
| ENSG00000182372 | CLN8    | Protein CLN8.                                                                                                                                                                                              | 600143                               | Epilepsy, progressive, with mental retardation                                                                            |
| ENSG00000186395 | KRT10   | Keratin, type I cytoskeletal 10 (Cytokeratin-10) (CK-10) (Keratin-10) (K10).                                                                                                                               | 148080                               | Epidermolytic hyperkeratosis                                                                                              |
| ENSG00000188153 | COL4A5  | Collagen alpha-5(IV) chain precursor                                                                                                                                                                       | 303630<br>303630                     | Alport syndrome<br>Leiomyomatosis-nephropathy syndrome                                                                    |

\* Gene descriptions downloaded from Ensembl.

† Disease descriptions downloaded from OMIM.
